# Supplementary material for: Accumulation of storage proteins in plant seeds is mediated by amyloid formation
Source: PubMed Central journal article supplement (PMC7377382; doi:10.1371/journal.pbio.3000564), 2020-07-23
Supplement: pbio.3000564.s001.pdf [file pbio.3000564.s001.pdf]

Vicilin 47k [*Pisum sativum*] CBK38922.1

MH+ (mono): 1.008

MH+ (avg): 1.008

Tolerance (Da): 0.700

Number of Peaks: 1012

Abs. Int. \* 10e6

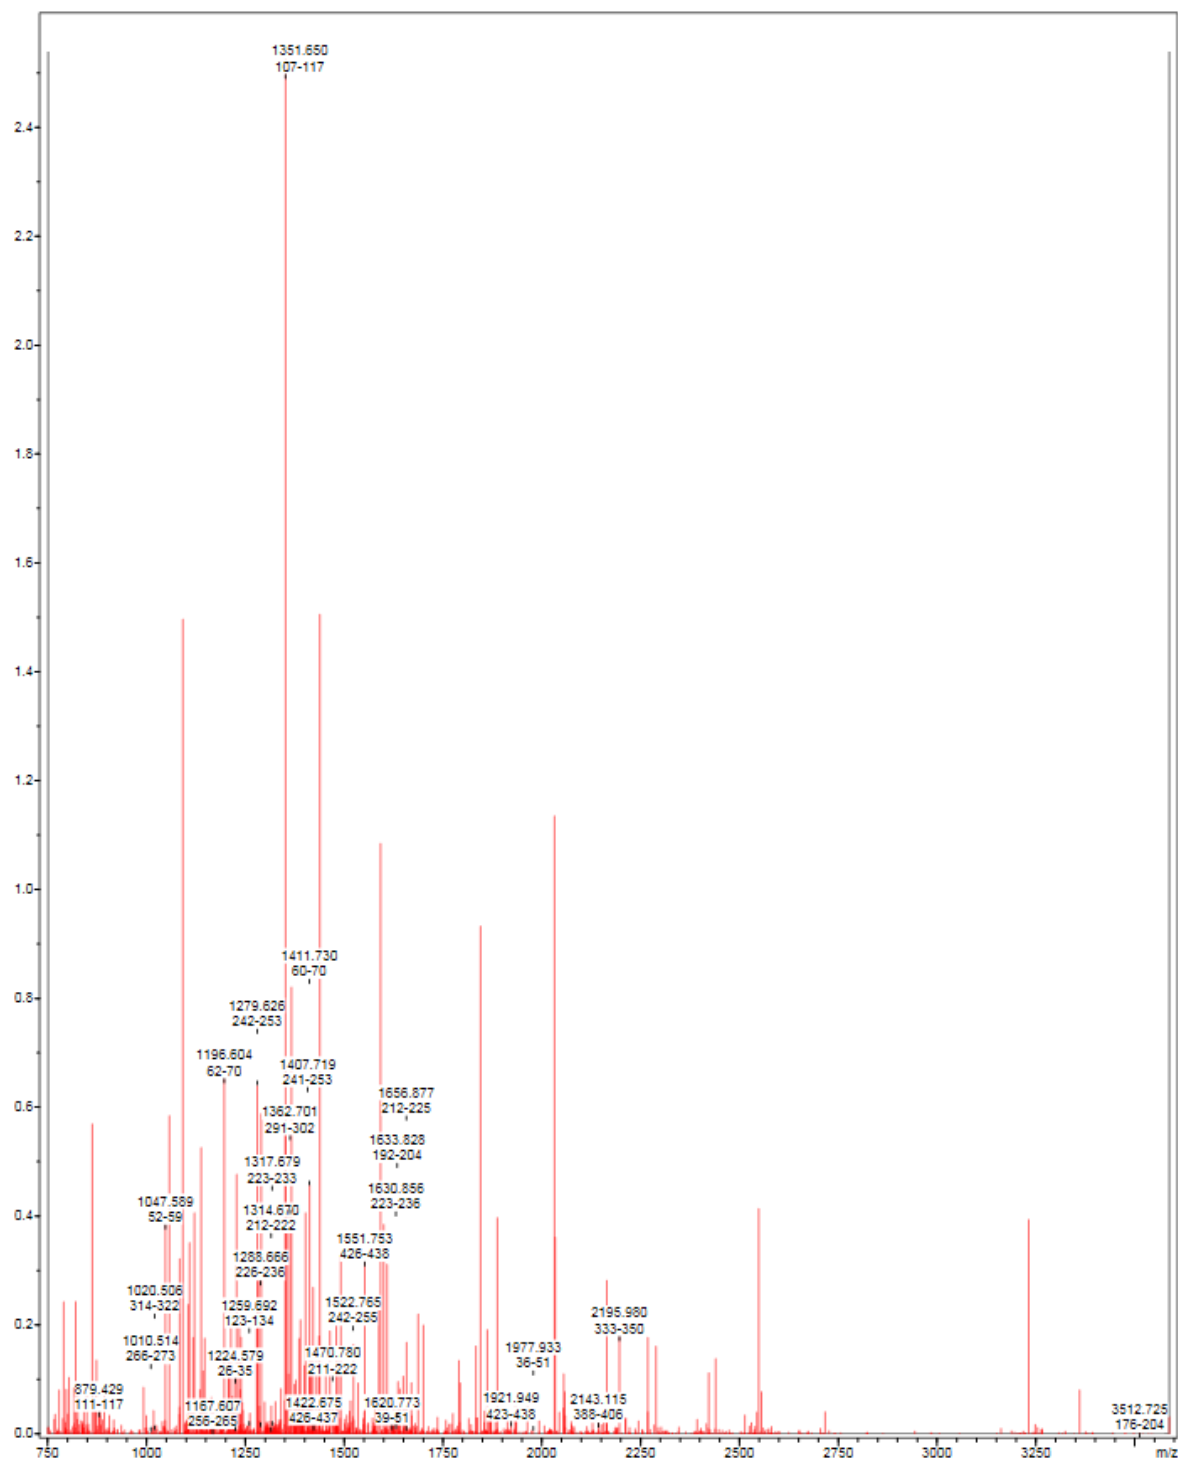

MAATPIKPLMLLAI~~FLASVCS~~SRSDQENPFIFKSNRFQTLYENENGHIRLLQKFDKRSKIFENLQNYRLL  
EYKSKPHTLFLPQYTDADFILVVLNGKATLTVLKSNDNRNSFNLERGDTIKLPAGTIAYLANRDDNEDLRVLD  
LAIPVNKPGQLQSFLLSGTQNPQLLSGFSKNILEAAFNTNYEEIEKVLLEQQEQEPQHRRSLKDRRQEIN  
EENVIVKVSREQIEELSKNAKSSSKKSVSSESGPFNLRSRNPISYKFKFFFEITPEKNQQLQDLDFVNSV  
DIKEGSLLLPNYNSRAIVIVTVTEGKGFELVGQRNENQGKENDKEEQEEETSKQVQLYKAKLSPGDVF  
VIPAGHPVAINASSDLNLIGFGINAENNERNFLAGEEDNVISQVQRVPVKELAFPGSSHEIDRLLKNQKQSYF  
ANAQPLQRE

**S1 Fig. Mass spectrometry identification data of the *P. sativum* Vicilin (47 kDa).** Amino acid sequence of Vicilin is shown. Peptides identified by mass spectrometry are indicated in red. Signal peptide is shown in green.
