# Supplementary material for: Accumulation of storage proteins in plant seeds is mediated by amyloid formation
Source: PubMed Central journal article supplement (PMC7377382; doi:10.1371/journal.pbio.3000564), 2020-07-23
Supplement: pbio.3000564.s009.pdf [file pbio.3000564.s009.pdf]

**S1 Table. Proteins identified in detergent resistant fraction of the *P. sativum* L. seeds.**

| Protein                                                                               | Accession <sup>1</sup> | Score <sup>2</sup> | MW <sup>3</sup> | pI <sup>4</sup> | SC <sup>5</sup> | Peptides <sup>6</sup> |
|---------------------------------------------------------------------------------------|------------------------|--------------------|-----------------|-----------------|-----------------|-----------------------|
| Vicilin                                                                               | P13918.2               | 2246.41            | 52.26           | 5.28            | 60.78           | 34                    |
| Vicilin precursor, partial                                                            | CAA68708.1             | 1933.73            | 49.49           | 5.21            | 59.82           | 32                    |
| Vicilin 47k                                                                           | CBK38920.1             | 1443.46            | 49.92           | 5.28            | 43.76           | 27                    |
| Vicilin, partial                                                                      | CAF25232.1             | 1431.21            | 47.25           | 5.28            | 49.40           | 28                    |
| Vicilin 47k                                                                           | CBK38922.1             | 1390.83            | 49.69           | 5.47            | 52.51           | 29                    |
| Ferritin                                                                              | AAB24082.1             | 1367.35            | 23.62           | 5.50            | 50.00           | 13                    |
| Vicilin 47k                                                                           | CBK38917.1             | 1170.04            | 49.49           | 5.36            | 41.32           | 24                    |
| Legumin A2                                                                            | P15838.1               | 1167.20            | 59.64           | 6.20            | 34.04           | 21                    |
| LegA class precursor                                                                  | CAA10722.1             | 1147.36            | 59.16           | 6.15            | 32.50           | 21                    |
| Legumin                                                                               | CAA26720.1             | 1063.18            | 57.99           | 6.09            | 33.33           | 21                    |
| Ferritin                                                                              | CAA51786.1             | 987.69             | 28.86           | 6.01            | 43.48           | 12                    |
| Provicilin                                                                            | P02854.1               | 976.04             | 46.41           | 5.26            | 38.54           | 20                    |
| Provicilin, Type A                                                                    | P02855.1               | 975.72             | 31.52           | 5.47            | 56.36           | 19                    |
| Convicilin                                                                            | CAB82855.1             | 787.07             | 72.14           | 5.38            | 25.45           | 17                    |
| Convicilin, precursor                                                                 | P13915.1               | 751.18             | 67.07           | 6.29            | 31.35           | 19                    |
| Cvc, partial                                                                          | CAP06315.1             | 627.98             | 62.16           | 5.58            | 26.00           | 17                    |
| Legumin J                                                                             | P05692.1               | 391.89             | 57.21           | 5.64            | 25.45           | 10                    |
| Lectin                                                                                | P02867.1               | 388.54             | 30.25           | 4.76            | 13.82           | 4                     |
| Cvc, Partial                                                                          | CAP06314.1             | 377.99             | 53.23           | 5.15            | 24.39           | 11                    |
| Legumin K                                                                             | P05693.1               | 369.99             | 39.83           | 5.28            | 29.43           | 8                     |
| Convicilin, precursor                                                                 | P13919.2               | 344.14             | 46.37           | 5.19            | 22.54           | 8                     |
| Vicilin, 14 Kda component                                                             | P02856.1               | 284.10             | 14.03           | 5.13            | 41.94           | 6                     |
| Albumin-2                                                                             | P08688.1               | 264.60             | 26.40           | 5.02            | 21.65           | 7                     |
| Legumin (minor small)                                                                 | CAA47809.1             | 214.01             | 65.18           | 5.30            | 10.60           | 4                     |
| Alpha-Galactosidase 1                                                                 | CAF34023.1             | 177.29             | 45.40           | 6.59            | 12.84           | 4                     |
| Acetyl-Coenzyme A Carboxylase<br>Carboxyl Transferase subunit Alpha,<br>Chloroplastic | Q41008.1               | 146.73             | 96.48           | 9.83            | 22.74           | 14                    |
| Elongation Factor 1-Alpha                                                             | Q41011.1               | 136.15             | 49.55           | 9.60            | 18.57           | 7                     |
| Seed Biotin-containing protein SBP65                                                  | Q41060.1               | 124.36             | 59.63           | 5.88            | 23.59           | 11                    |
| Gag/Pol polyprotein                                                                   | AAQ82037.1             | 122.36             | 258.16          | 6.32            | 13.84           | 23                    |
| Dehydrin 2                                                                            | AAB51380.1             | 116.52             | 27.13           | 6.56            | 28.24           | 5                     |
| 110 kDa 4SNC-Tudor domain protein                                                     | BAC06184.1             | 107.27             | 108.61          | 7.67            | 18.10           | 17                    |
| Acetyl-Coa Carboxylase, partial                                                       | BAA94752.1             | 103.50             | 91.37           | 9.69            | 20.36           | 12                    |

<sup>1</sup>UniProt accession number;

<sup>2</sup>MASCOT protein score (index for determining accuracy identification by Mascot software);

<sup>3</sup>Calculated molecular weight. kDa;

<sup>4</sup>Calculated isoelectric point;

<sup>5</sup>Protein sequence coverage (%);

<sup>6</sup>Number of unique peptides matched to mass peaks.
