# Supplementary material for: Accumulation of storage proteins in plant seeds is mediated by amyloid formation
Source: PubMed Central journal article supplement (PMC7377382; doi:10.1371/journal.pbio.3000564), 2020-07-23
Supplement: pbio.3000564.s010.pdf [file pbio.3000564.s010.pdf]

**S2 Table. Content of the secondary structure elements (%\*) in plant proteins and human A $\beta$ -peptide (1-42 aa).**

| Protein state                                                                | Protein   | $\alpha$ -helix | $\beta$ -sheet | $\beta$ -turn | Disordered  |
|------------------------------------------------------------------------------|-----------|-----------------|----------------|---------------|-------------|
| Soluble proteins<br>(50% HFIP)                                               | Vicilin   | 8 $\pm$ 1       | 39 $\pm$ 1     | 21 $\pm$ 1    | 32 $\pm$ 4* |
|                                                                              | Cupin-1.1 | 52 $\pm$ 3      | 4 $\pm$ 1      | 18 $\pm$ 3    | 26 $\pm$ 3  |
|                                                                              | Cupin-1.2 | 38 $\pm$ 1      | 12 $\pm$ 1     | 20 $\pm$ 2    | 30 $\pm$ 3  |
|                                                                              | A $\beta$ | 53 $\pm$ 2      | 7 $\pm$ 1      | 16 $\pm$ 2    | 24 $\pm$ 4  |
| Fibrillar proteins<br>(distilled water,<br>7 days after<br>HFIP evaporation) | Vicilin   | 4 $\pm$ 1       | 41 $\pm$ 3     | 20 $\pm$ 2    | 35 $\pm$ 6  |
|                                                                              | Cupin-1.1 | 4 $\pm$ 1       | 40 $\pm$ 1     | 21 $\pm$ 2    | 35 $\pm$ 4  |
|                                                                              | Cupin-1.2 | 3 $\pm$ 2       | 42 $\pm$ 2     | 23 $\pm$ 2    | 32 $\pm$ 1  |
|                                                                              | A $\beta$ | 3 $\pm$ 1       | 40 $\pm$ 1     | 20 $\pm$ 1    | 37 $\pm$ 2  |

\*Results are shown as the mean (%)  $\pm$  the standard deviation.
