# Supplementary material for: Accumulation of storage proteins in plant seeds is mediated by amyloid formation
Source: PubMed Central journal article supplement (PMC7377382; doi:10.1371/journal.pbio.3000564), 2020-07-23
Supplement: pbio.3000564.s011.pdf [file pbio.3000564.s011.pdf]

**S3 Table. Oligonucleotides used in this study.**

| <b>Primer</b>  | <b>Sequence 5'–3'</b>                      |
|----------------|--------------------------------------------|
| VicHindF       | TACCAAGCTTATGAGATCCGATCAAGAGAACC           |
| VicBamR        | ATTAGGATCCCTCTCTTTGCAGAGGCTGA              |
| CUP1(1)HindF   | ATGTAAGCTTATGTATGAGAACGAAAACGGTCA          |
| CUP1(1)BamR    | TAACGGATCCTTCTATCTCCTCGTAATTGGT            |
| CUP1(2)HindF   | TACAAAGCTTATGAGAAGTCGCAATCCTATCTA          |
| CUP1(2)BamR    | TAACGGATCCATCAACCTCATGAGAAGATC             |
| CDVicNot1F     | TACTGCGGCCGCAAGATCCGATCAAGAGAACC           |
| CDVicSal1R     | ACGTGTCGACTTACTCTCTTTGCAGAGGCTGA           |
| CDCUP1(1)Not1F | TACAGCGGCCGCATATGAGAACGAAAACGGTCA          |
| CDCUP1(1)Sal1R | TAACGTGCGACTTATTCTATCTCCTCGTAATTGGT        |
| CDCUP1(2)Not1F | TACAGCGGCCGCAAGAAGTCGCAATCCTATCTA          |
| CDCUP1(2)Sal1R | ACGTGTCGACTTAATCAACCTCATGAGAAGATC          |
| AlicVicF       | AGAAGGAGATATAACTATGAGATCCGATCAAGAGAACC     |
| AlicVicR       | GTGGTGGTGATGGTGATGGCCCTCTCTTTGCAGAGGCTGA   |
| AlicCUP1(1)F   | AGAAGGAGATATAACTATGTATGAGAACGAAAACGGTCA    |
| AlicCUP1(1)R   | GTGGTGGTGATGGTGATGGCCTTCTATCTCCTCGTAATTGGT |
| AlicCUP1(2)F   | AGAAGGAGATATAACTATGAGAAGTCGCAATCCTATCTA    |
| AlicCUP1(2)R   | GTGGTGGTGATGGTGATGGCCATCAACCTCATGAGAAGATC  |
