# Supplementary material for: Accumulation of storage proteins in plant seeds is mediated by amyloid formation
Source: PubMed Central journal article supplement (PMC7377382; doi:10.1371/journal.pbio.3000564), 2020-07-23
Supplement: pbio.3000564.s012.pdf [file pbio.3000564.s012.pdf]

1 **S1 Data. Per-residue  $\beta$ -sheet propensity for the full-length Vicilin protein and its**  
 2 **domains, Cupin-1.1 and Cupin-1.2.**

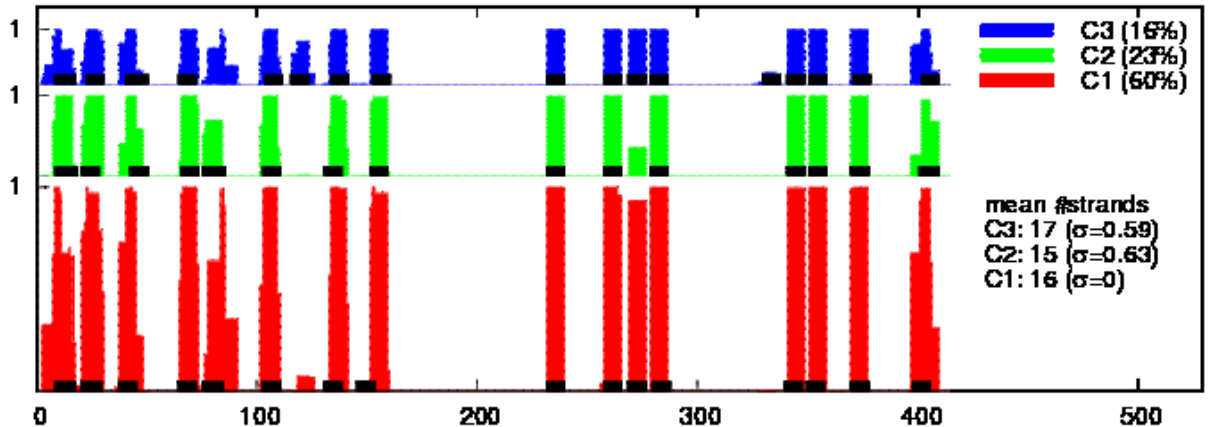

3 **Fig 1.** Per-residue  $\beta$ -sheet propensity for full-length Vicilin predicted by the AmyloidMutants<sup>1</sup>  
 4 program. The x-axis indicates residue position. Each cluster ("C1","C2",...) is given its own  
 5 color, one on top of another, with the relative size of that cluster in the ensemble indicated by its  
 6 vertical size and the percentage in the legend. The largest cluster is the most probable  
 7 structure. The y-axis the  $\beta$ -sheet propensity of each residue position, for each cluster. Black  
 8 lines indicate the  $\beta$ -sheet assignment of a single representative mediod structure that is at the  
 9 center of each cluster.  
 10

11

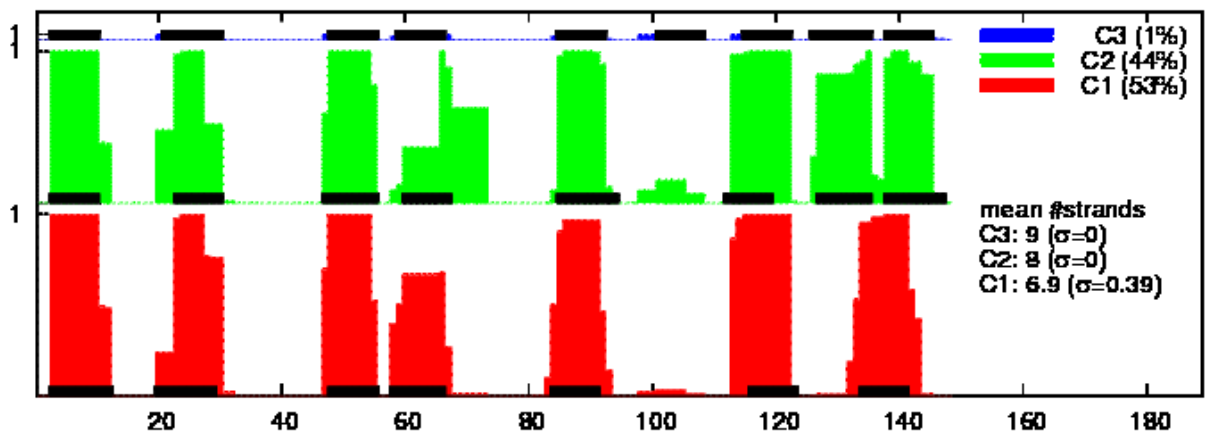

12 **Fig 2.** Per-residue  $\beta$ -sheet propensity for Cupin-1.1 predicted by the AmyloidMutants<sup>1</sup>  
 13 program. The x-axis indicates residue position. Each cluster ("C1","C2",...) is given its own  
 14 color, one on top of another, with the relative size of that cluster in the ensemble indicated by  
 15 its vertical size and the percentage in the legend. The largest cluster is the most probable  
 16 structure. The y-axis the  $\beta$ -sheet propensity of each residue position, for each cluster. Black  
 17 lines indicate the  $\beta$ -sheet assignment of a single representative mediod structure that is at the  
 18 center of each cluster.  
 19

19

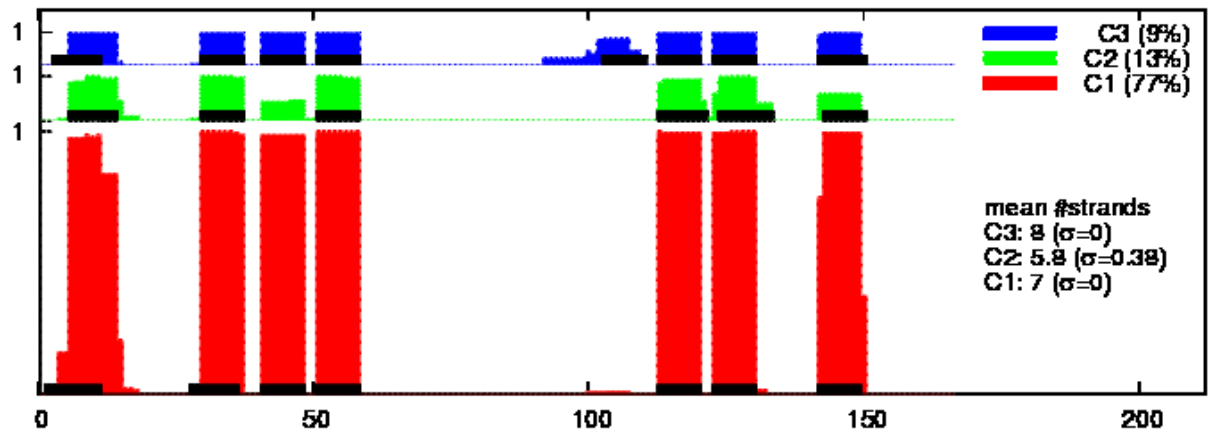

20

21 **Fig 3.** Per-residue  $\beta$ -sheet propensity for Cupin-1.2 predicted by the AmyloidMutants<sup>1</sup> program.  
 22 The x-axis indicates residue position. Each cluster ("C1","C2",...) is given its own color, one on  
 23 top of another, with the relative size of that cluster in the ensemble indicated by its vertical size  
 24 and the percentage in the legend. The largest cluster is the most probable structure. The y-axis  
 25 the  $\beta$ -sheet propensity of each residue position, for each cluster. Black lines indicate the  $\beta$ -sheet  
 26 assignment of a single representative mediod structure that is at the center of each cluster.

27

28 **Reference:**

- 29 1. O'Donnell, C. W. *et al.* A method for probing the mutational landscape of amyloid  
 30 structure. *Bioinformatics* (2011). doi:10.1093/bioinformatics/btr238

31
