# Supplementary material for: Accumulation of storage proteins in plant seeds is mediated by amyloid formation
Source: PubMed Central journal article supplement (PMC7377382; doi:10.1371/journal.pbio.3000564), 2020-07-23
Supplement: pbio.3000564.s014.pdf [file pbio.3000564.s014.pdf]

Li - Ch1  
256.0 x 256.0

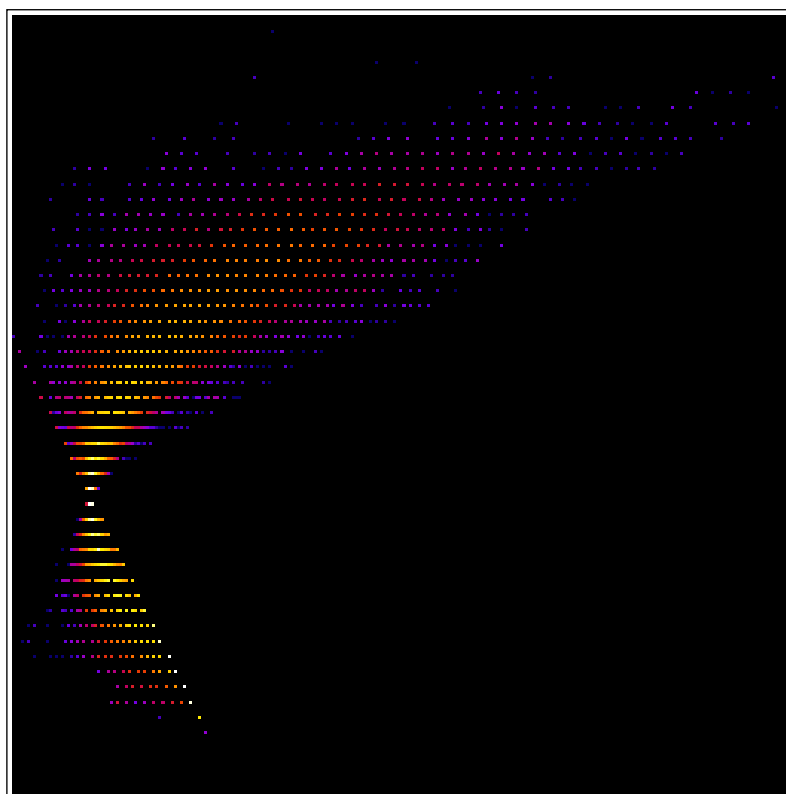

Channel 2  
MAX\_Pea-12.12.18-2-  
0002.tif

Channel 1  
MAX\_Pea-12.12.18-2-0001.tif

Li - Ch2  
256.0 x 256.0

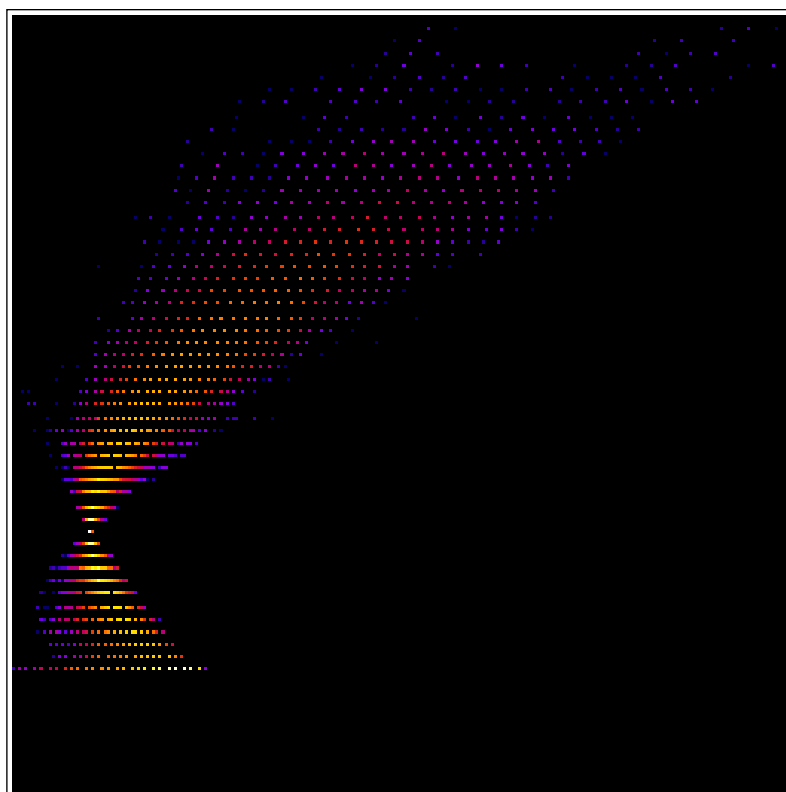

Channel 2  
MAX\_Pea-12.12.18-2-  
0002.tif

Channel 1  
MAX\_Pea-12.12.18-2-0001.tif

---

2D intensity histogram

256.0 x 256.0

Channel 2  
MAX\_Pea-12.12.18-2-  
0002.tif

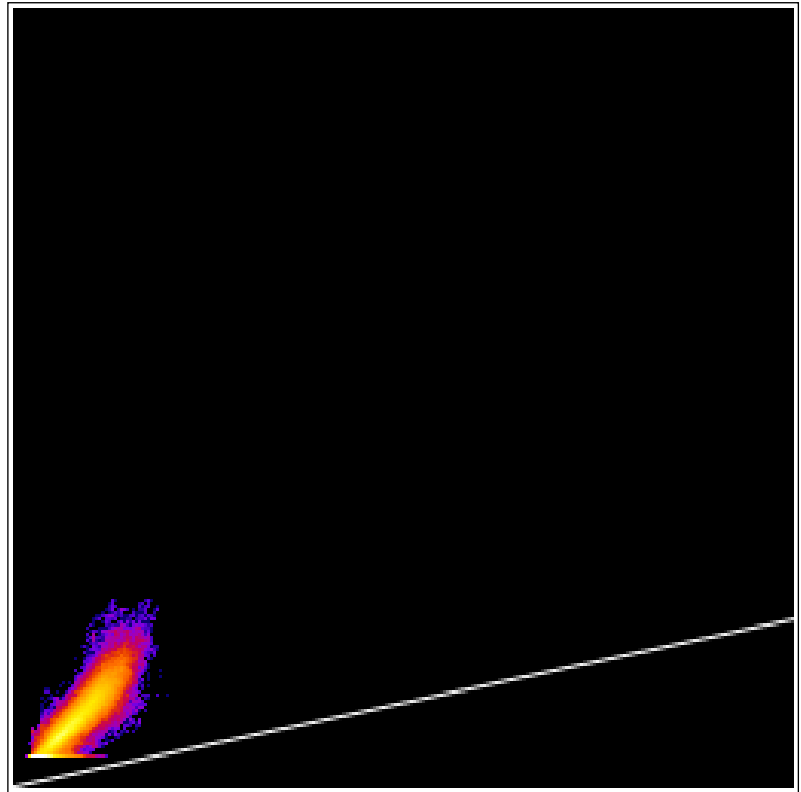

Channel 1  
MAX\_Pea-12.12.18-2-0001.tif

Smoothed & shuffled channel 1

1024.0 x 1024.0

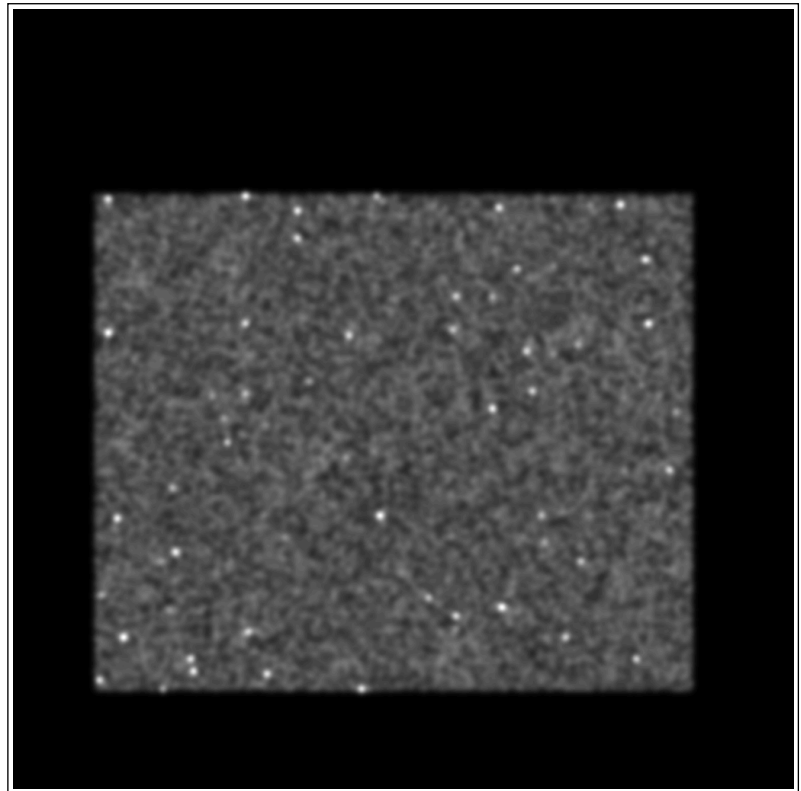

Channel 2  
MAX\_Pea-12.12.18-2-  
0002.tif

Channel 1  
MAX\_Pea-12.12.18-2-0001.tif

Channel 1 (Max Projection)

782.0 x 649.0

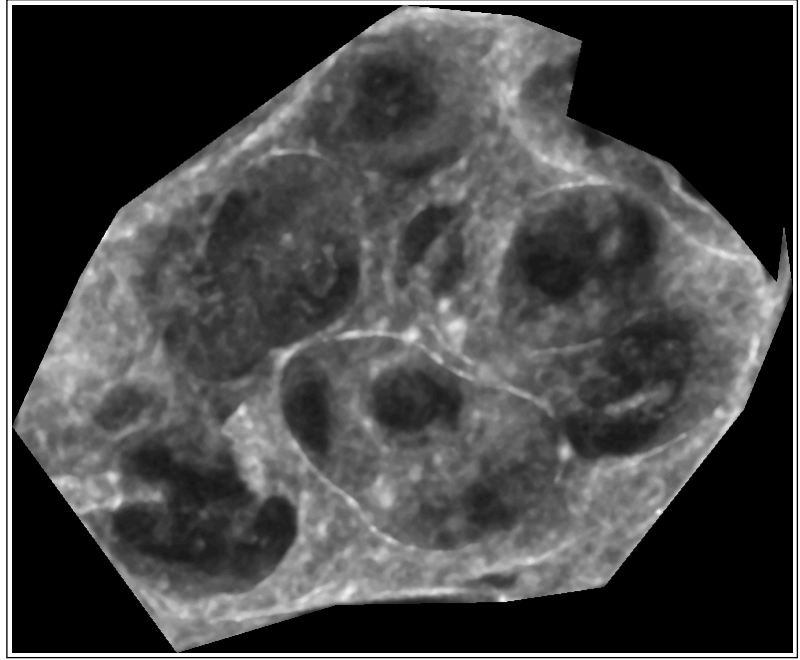

Channel 2  
MAX\_Pea-12.12.18-2-  
0002.tif

Channel 1  
MAX\_Pea-12.12.18-2-0001.tif

Channel 2 (Max Projection)

782.0 x 649.0

Channel 2  
MAX\_Pea-12.12.18-2-  
0002.tif

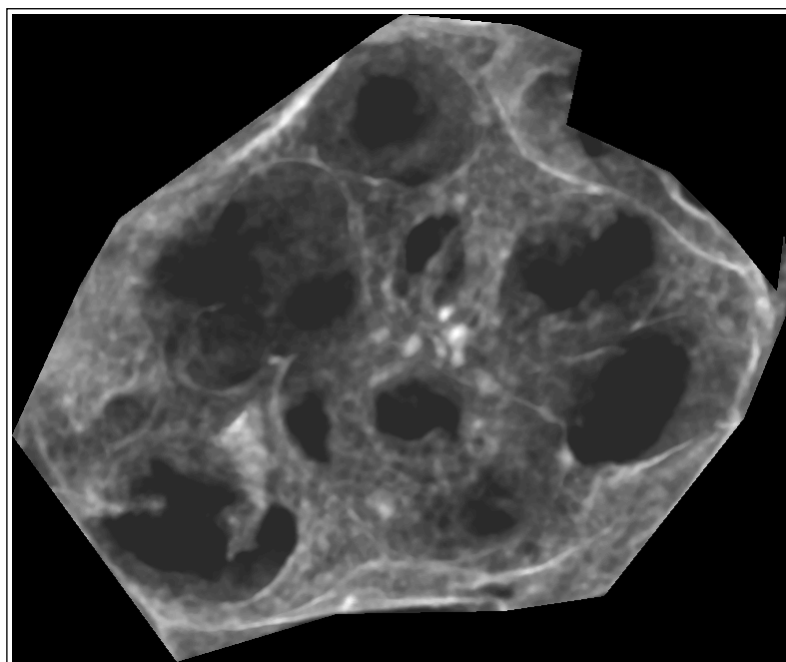

Channel 1  
MAX\_Pea-12.12.18-2-0001.tif

Coloc\_Job\_Name: Colocalization\_of\_MAX\_Pea-12.12.18-2-0001.tif\_versus\_MAX\_Pea-12.12.18-2-0002.tif\_1406882939

% zero-zero pixels: 0.00

% saturated ch1 pixels: 0.00

% saturated ch2 pixels: 0.01

Channel 1 Max: 50.000

Channel 2 Max: 61.000

Channel 1 Min: 4.000

Channel 2 Min: 10.000

Channel 1 Mean: 19.406

Channel 2 Mean: 21.099

Channel 1 Integrated (Sum) Intensity: 6412859.000

Channel 2 Integrated (Sum) Intensity: 6972572.000

Mask Type Used: mask image

Mask ID Used: 1406882939

m (slope): 1.09

b (y-intercept): -0.12

b to y-mean ratio: -0.01

Ch1 Max Threshold: 11.00

Ch2 Max Threshold: 12.00

Threshold regression: Bisection

Pearson's R value (no threshold): 0.90

Pearson's R value (below threshold): 0.01

Pearson's R value (above threshold): 0.87

Li's ICQ value: 0.394

Spearman's rank correlation value: 0.91669678  
Spearman's correlation t-statistic: 1318.7978  
t-statistic degrees of freedom: 330461.000  
Manders' M1 (Above zero intensity of Ch2): 1.000  
Manders' M2 (Above zero intensity of Ch1): 1.000  
Manders' tM1 (Above autothreshold of Ch2): 0.919  
Manders' tM2 (Above autothreshold of Ch1): 0.928  
Kendall's Tau-b rank correlation value: 0.7795  
Costes P-Value: 1.00  
Costes Shuffled Mean: 0.00  
Costes Shuffled Std.D.: 0.02  
Ratio of rand. Pearsons >= actual Pearsons value : 0.00
