# Supplementary material for: Accumulation of storage proteins in plant seeds is mediated by amyloid formation
Source: PubMed Central journal article supplement (PMC7377382; doi:10.1371/journal.pbio.3000564), 2020-07-23

**Fig 1C.**

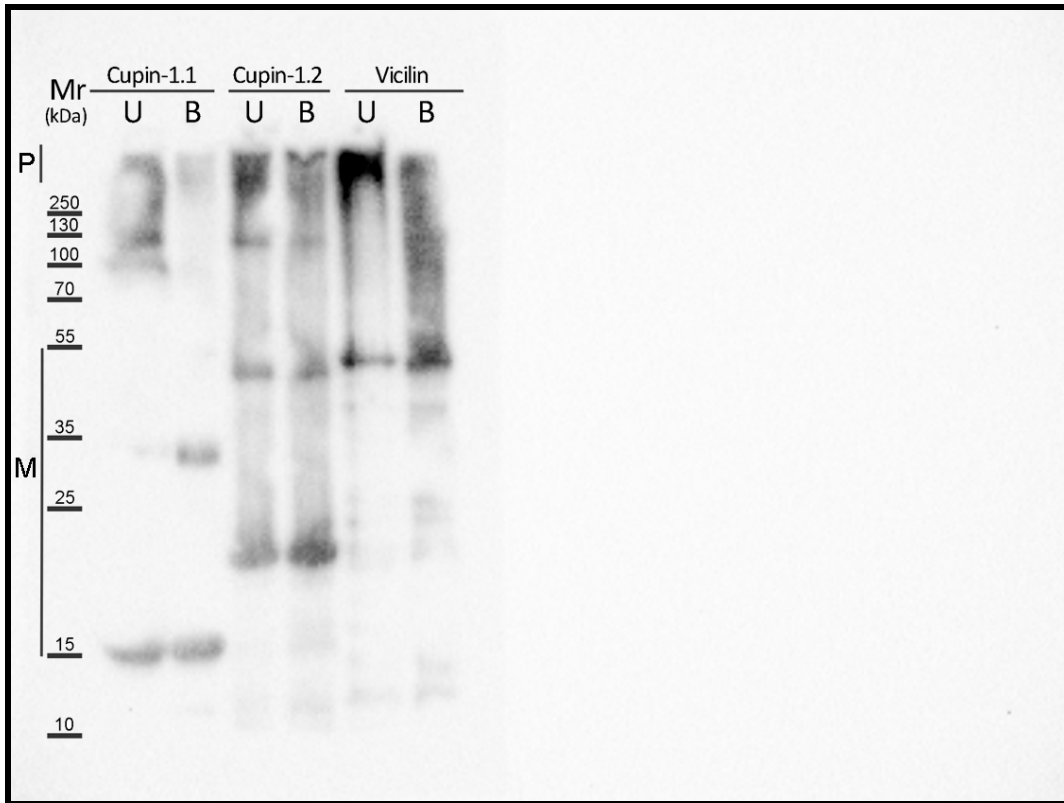

**Fig 3B.**

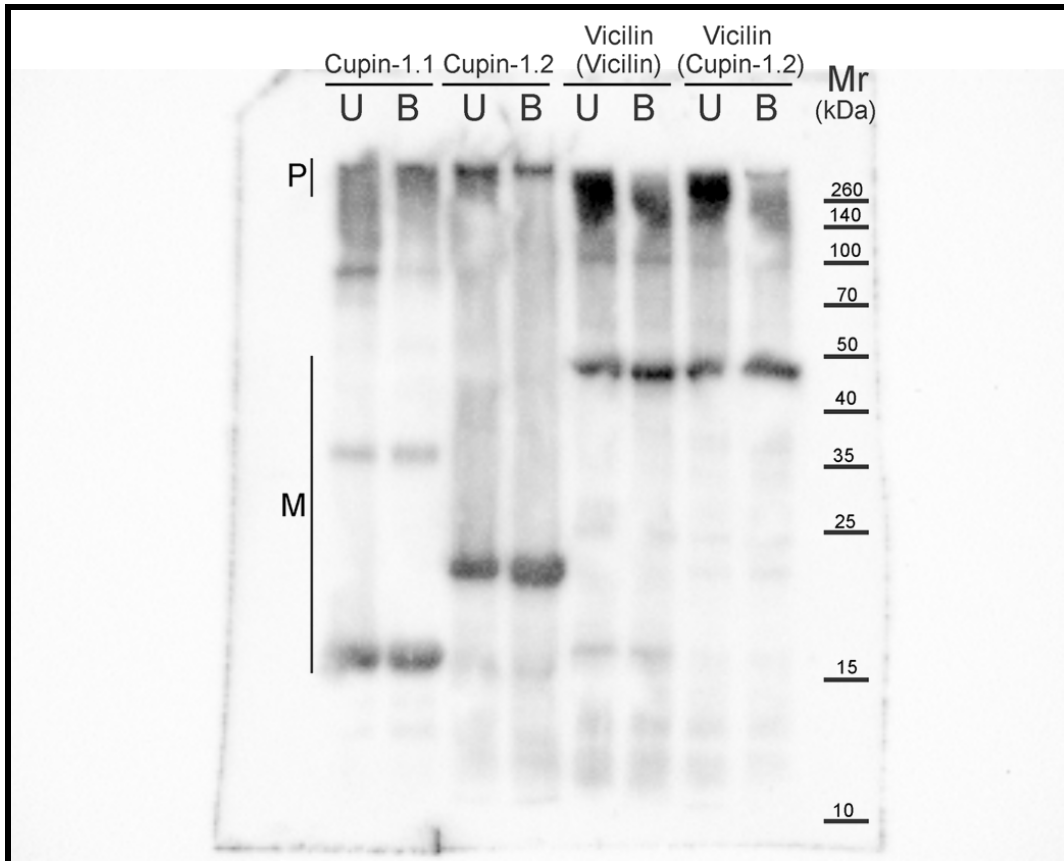

Fig 5N, left.

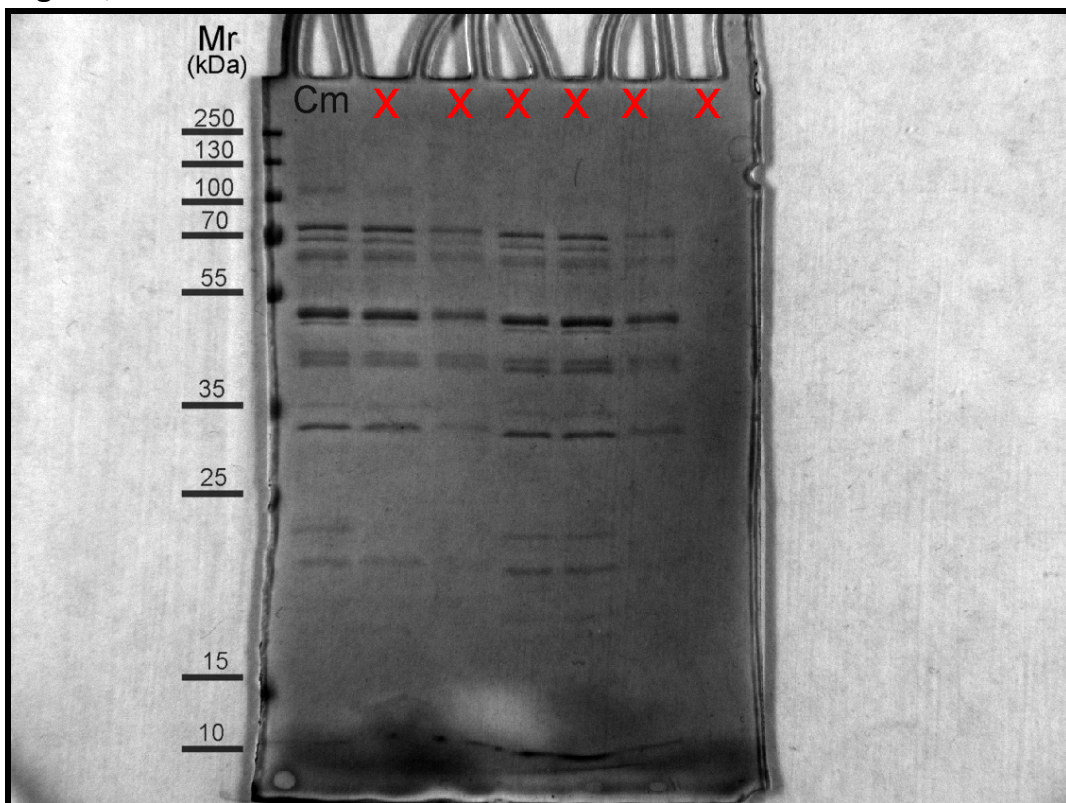

Fig 5N, right.

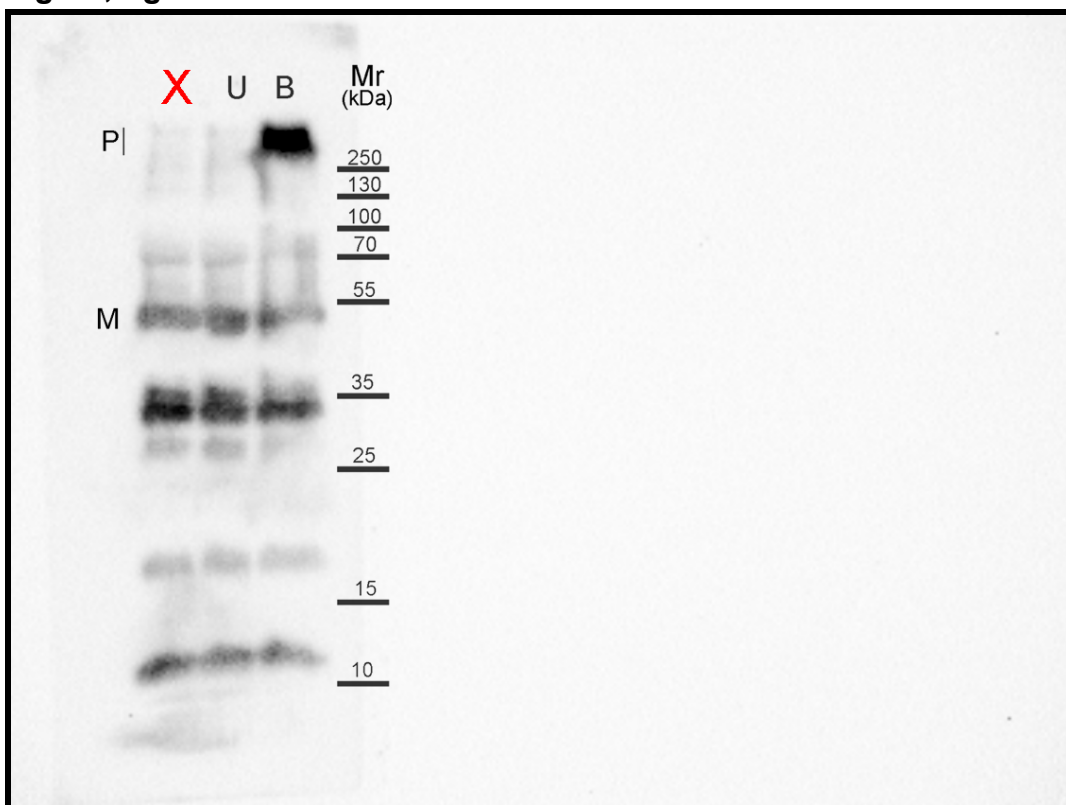

Fig 5O.

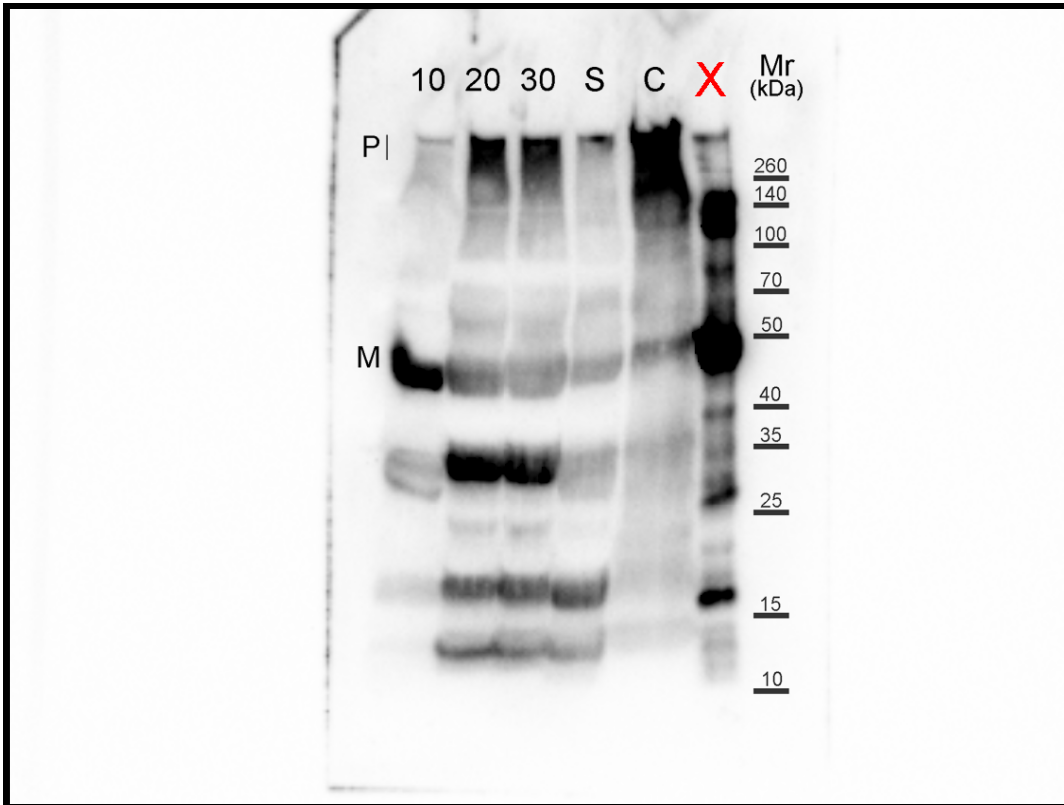

Fig 5P.

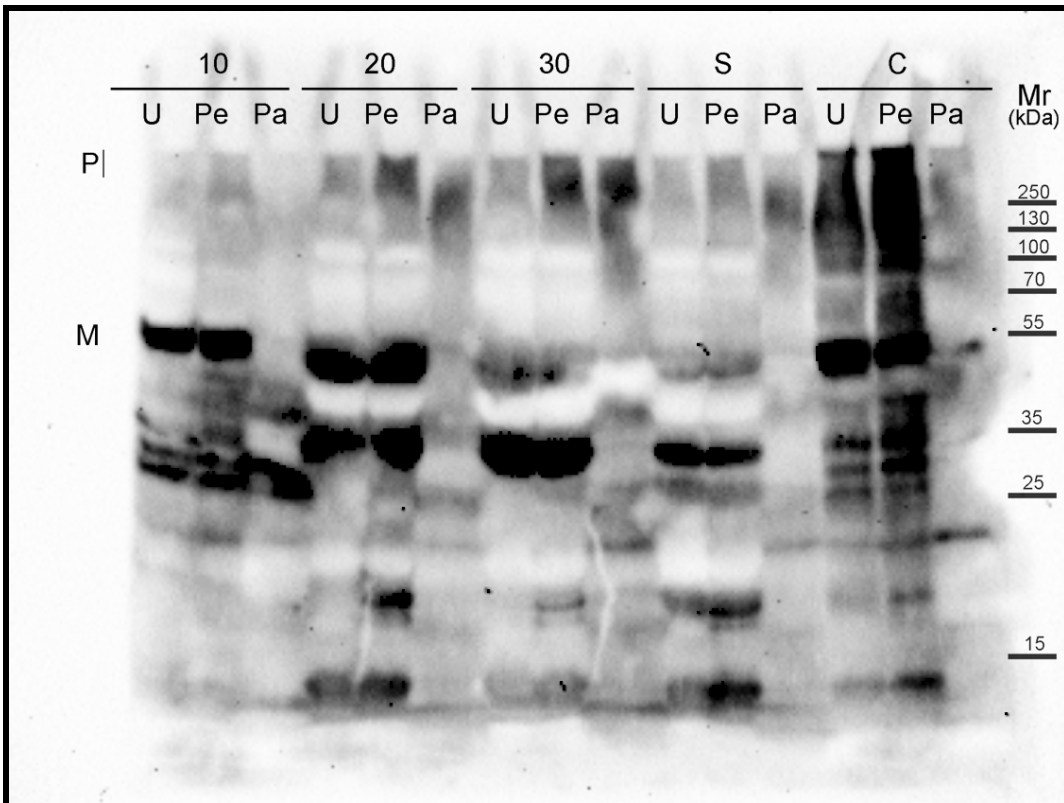

**Fig S3.**

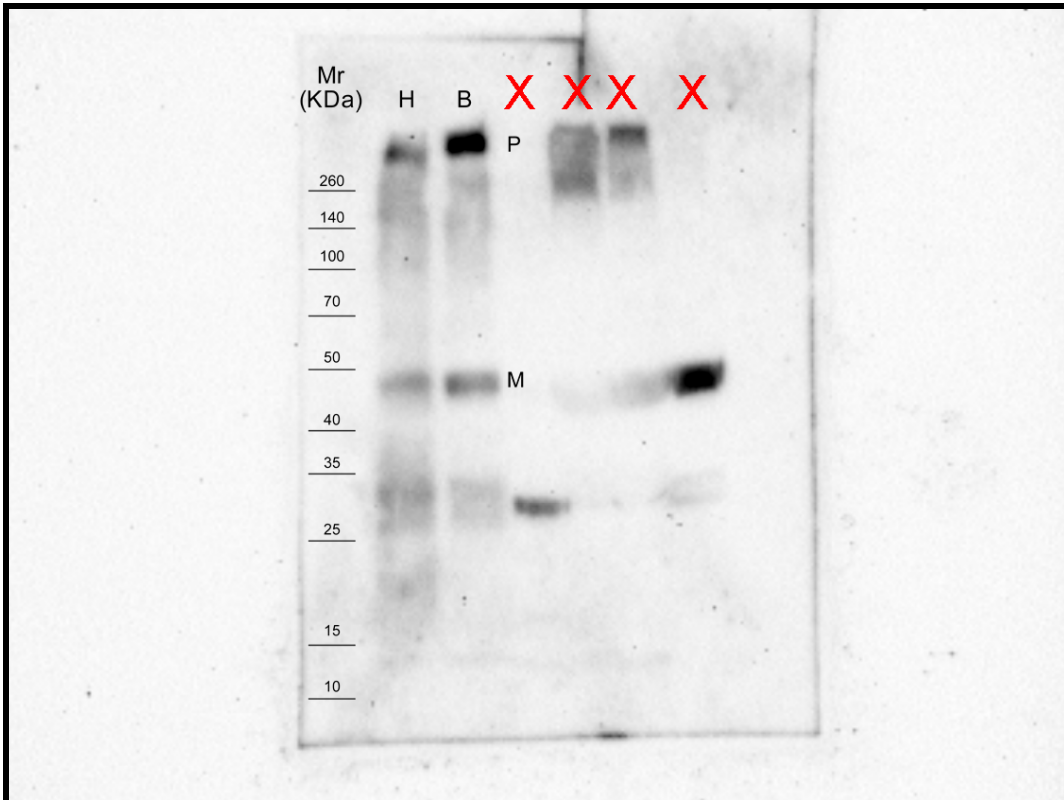

**Fig S4, left.**

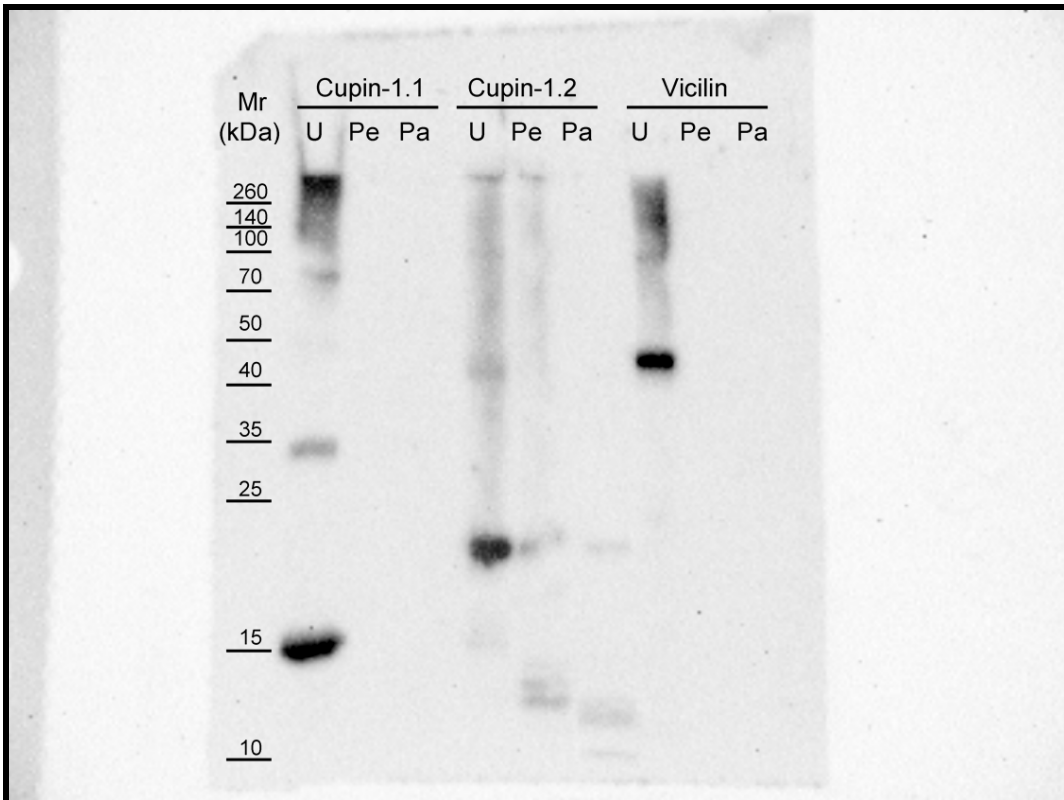

Fig S4, right.

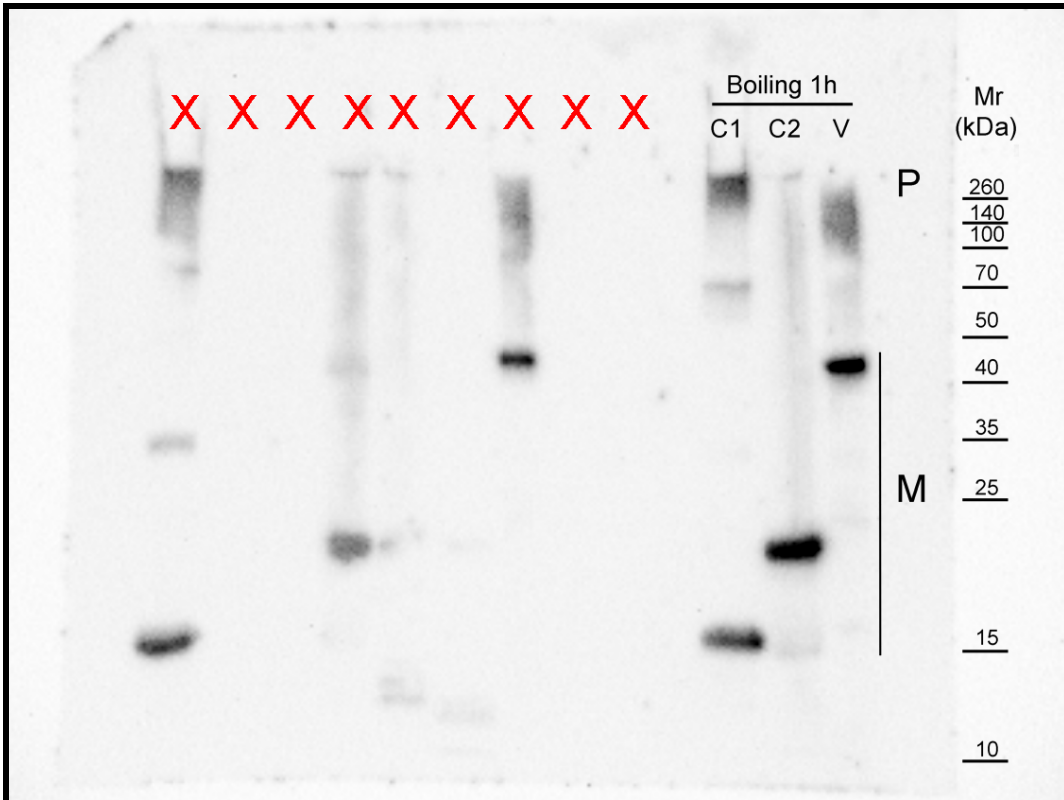

Fig S5.

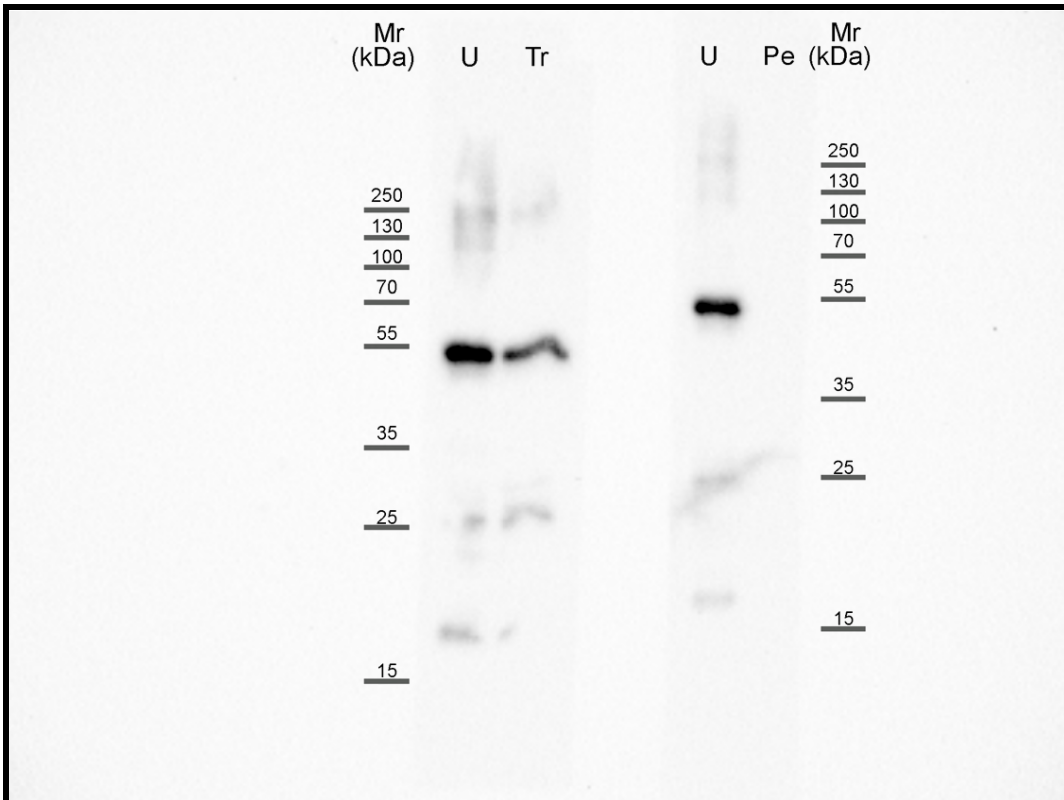



**Fig S6.**

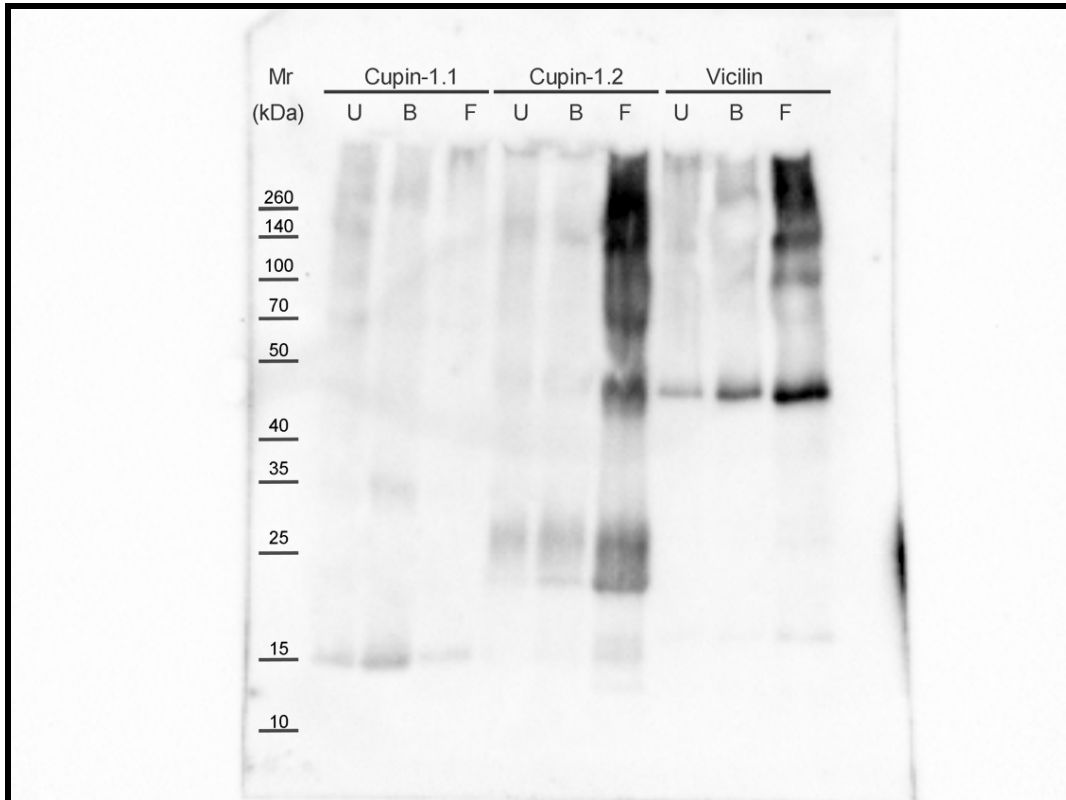

**Fig S8, left.**

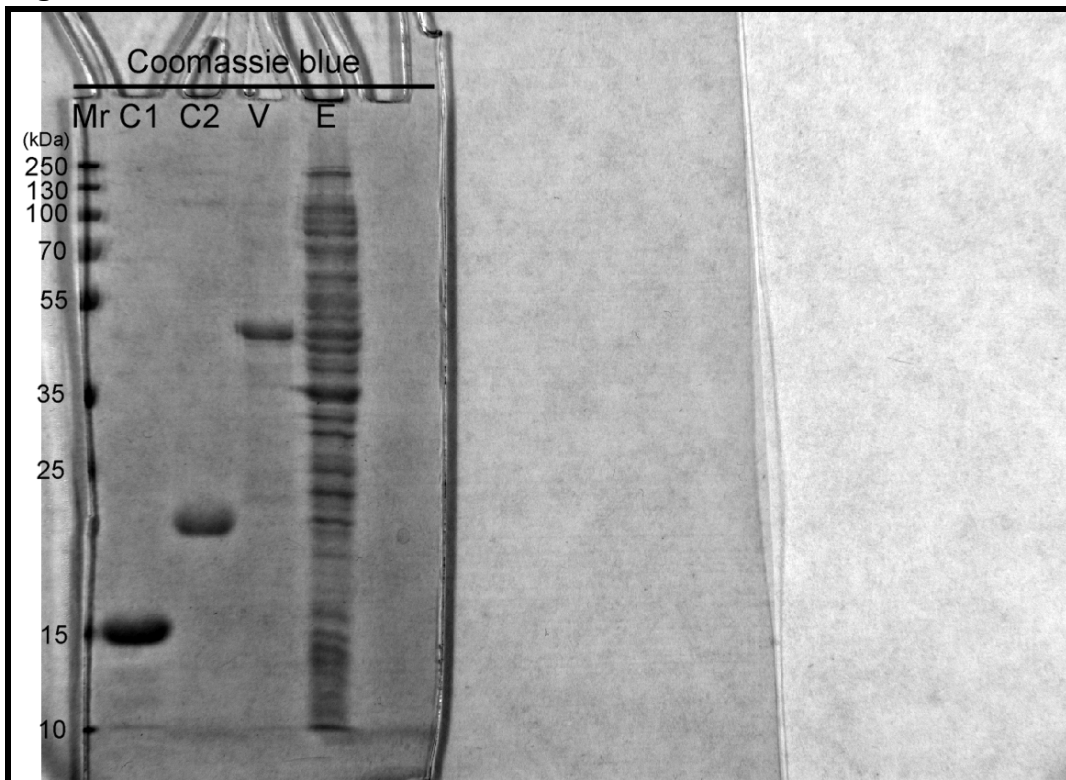

**Fig S8, right.**

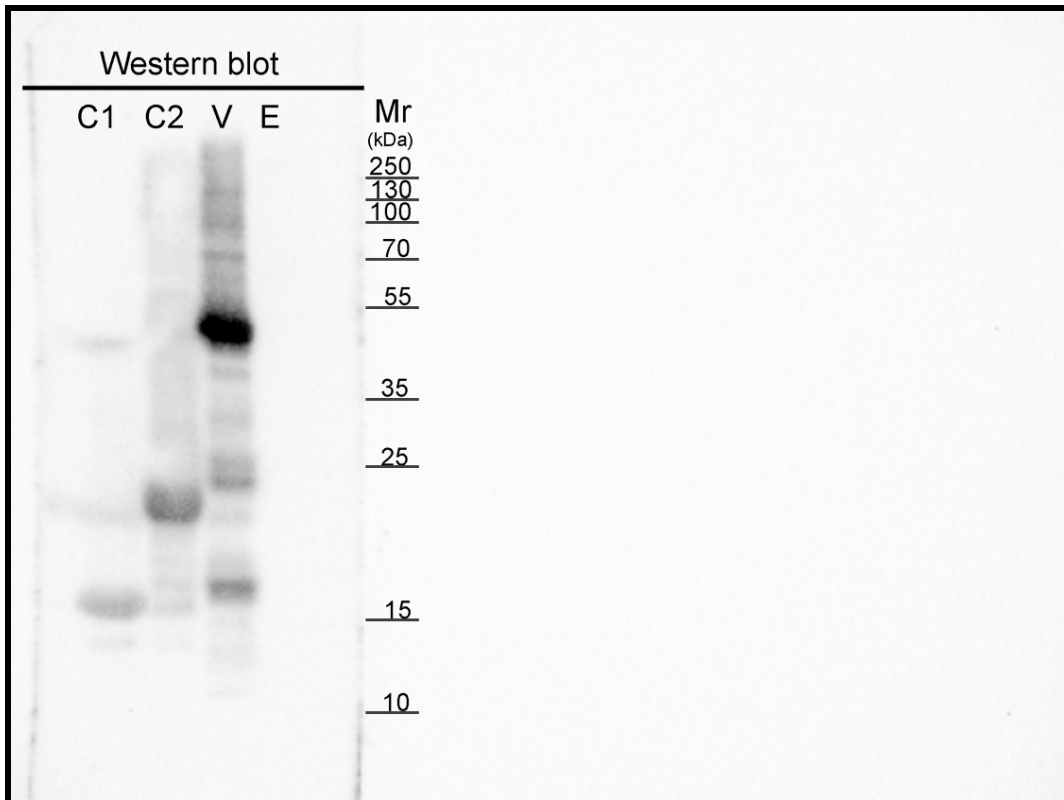

Supplement: pbio.3000564.s016.pdf [file pbio.3000564.s016.pdf]
